# Supplementary material for: Crystal structures, intermolecular interactions and fluorescence properties of a series of symmetrical bi-1,3,4-oxadiazole derivatives
Source: Royal Society of Chemistry journal article supplement (doi:10.1039/c6tc00324a), 2016-01-01
Supplement: c6tc00324a1.pdf [file c6tc00324a1.pdf]

## Supporting information

# Crystal structures, intermolecular interactions and fluorescence properties of a series of symmetrical bi-1,3,4-oxadiazole derivatives

Fangyi Chen,<sup>a</sup> Taiji Tian,<sup>a</sup> Binglian Bai,<sup>b</sup> Jian Wang,<sup>c</sup> Haitao Wang\*<sup>a</sup> and Min Li\*<sup>a</sup>

<sup>a</sup> Key Laboratory of Automobile Materials (MOE) & College of Materials Science and Engineering, Jilin University, Changchun 130012, China

<sup>b</sup> College of Physics, Jilin University, Changchun 130012, China

<sup>c</sup> Institute of Theoretical Chemistry, Jilin University, Changchun 130023, China

## Contents

**Figure S1** (a) Single crystal structure of BOXD-*o*-F; (b) top view of the nearest dimer along the  $\pi$ -stacking direction of BOXD-*o*-F; (c) the crystal packing of BOXD-*o*-F viewed on the b axis. **(Page 3)**

**Figure S2** Other short contacts than  $\pi$ - $\pi$  stacking interactions found in BOXD-*o*-F crystals. **(Page 3)**

**Figure S3** (a) Single crystal structure of BOXD-*m*-F; (b) top view of the nearest dimer along the  $\pi$ -stacking direction of BOXD-*m*-F; (c) the crystal packing of BOXD-*m*-F viewed on the a axis. **(Page 4)**

**Figure S4** Other short contacts than  $\pi$ - $\pi$  stacking interactions found in BOXD-*m*-F crystals. **(Page 4)**

**Figure S5** (a) Single crystal structure of BOXD-*o*-OCH<sub>3</sub>; (b) top view of the nearest dimer along the  $\pi$ -stacking direction of BOXD-*o*-OCH<sub>3</sub>; (c) the crystal packing of BOXD-*o*-OCH<sub>3</sub> viewed on the b axis. **(Page 5)**

**Figure S6** Other short contacts than  $\pi$ - $\pi$  stacking interactions found in BOXD-*o*-OCH<sub>3</sub> crystals. **(Page 5)**

**Figure S7** Other short contacts than  $\pi$ - $\pi$  stacking interactions found in BOXD-1 crystals. **(Page 6)**

**Figure S8** (a) Single crystal structure of TBOXD; (b) top view of the nearest dimer along the  $\pi$ -stacking direction of TBOXD; (c) the crystal packing of TBOXD viewed on the b axis. **(Page 6)**

**Figure S9** Other short contacts than  $\pi$ - $\pi$  stacking interactions found in TBOXD crystals. **(Page 7)**

**Figure S10** Calculated total SPAT0 energy of all the structures. **(Page 7)**

**Figure S11** Calculated electrostatics of all the structures. **(Page 8)**

**Figure S12** Calculated exchange of all the structures. **(Page 8)**

**Figure S13** Calculated induction of all the structures. **(Page 9)**

**Figure S14** Calculated dispersion of all the structures. **(Page 9)**

**Figure S15** X-ray diffraction pattern of BOXD. **(Page 10)**

**Figure S16** X-ray diffraction pattern of BOXD-*o*-F. **(Page 10)**

**Figure S17** X-ray diffraction pattern of BOXD-*m*-F. **(Page 11)**

**Figure S18** X-ray diffraction pattern of BOXD-*p*-F. **(Page 11)**

**Figure S19** X-ray diffraction pattern of BOXD-*o*-OCH<sub>3</sub>. (Page 12)

**Figure S20** X-ray diffraction pattern of TBOXD. (Page 12)

**Table S1** Bond length of these bi-1,3,4-oxadiazole derivatives. (Page 13)

**Table S2** Bond angle of these bi-1,3,4-oxadiazole derivatives. (Page 13)

**Table S3** The calculated result of these bi-1,3,4-oxadiazole derivatives. (Page 14)

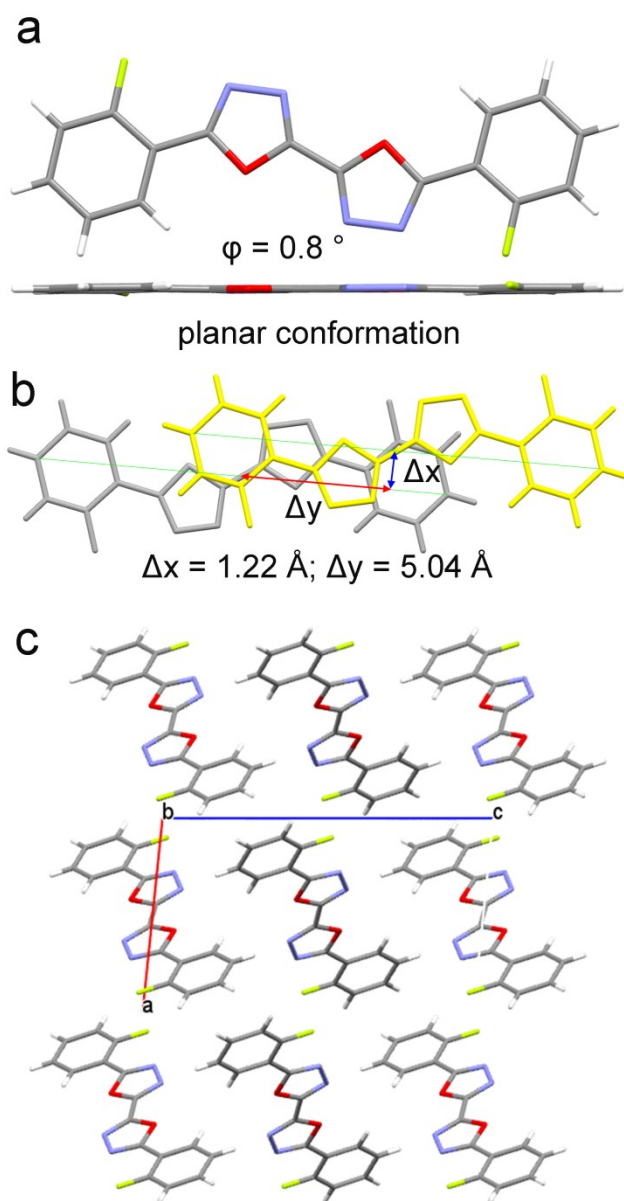

Figure S1 (a) Single crystal structure of BOXD-*o*-F; (b) top view of the nearest dimer along the  $\pi$ -stacking direction of BOXD-*o*-F; (c) the crystal packing of BOXD-*o*-F viewed on the *b* axis.

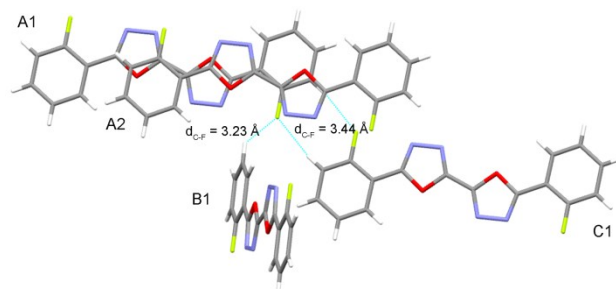

Figure S2 Other short contacts than  $\pi$ - $\pi$  stacking interactions found in BOXD-*o*-F crystals.

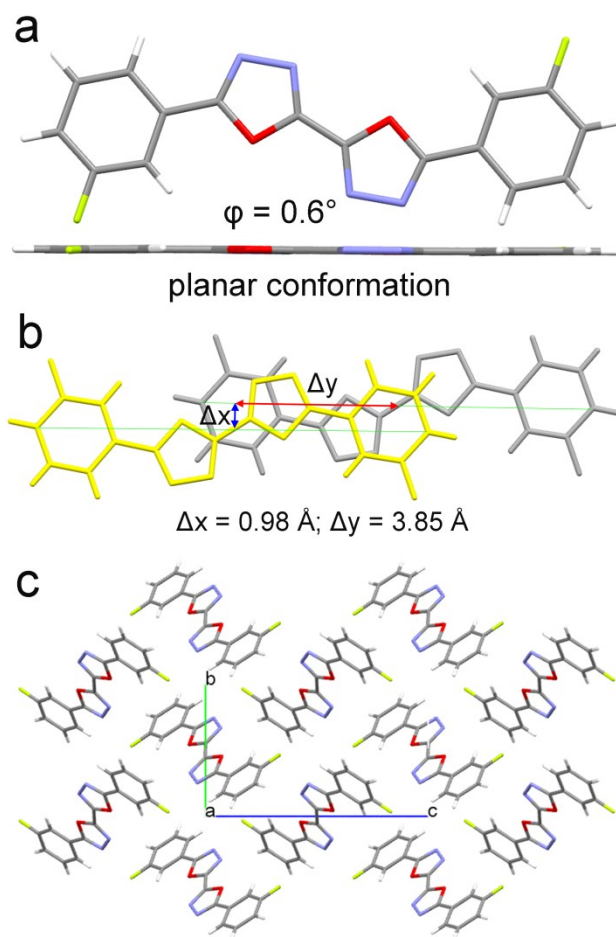

Figure S3 (a) Single crystal structure of BOXD-*m*-F; (b) top view of the nearest dimer along the  $\pi$ -stacking direction of BOXD-*m*-F; (c) the crystal packing of BOXD-*m*-F viewed on the *a* axis.

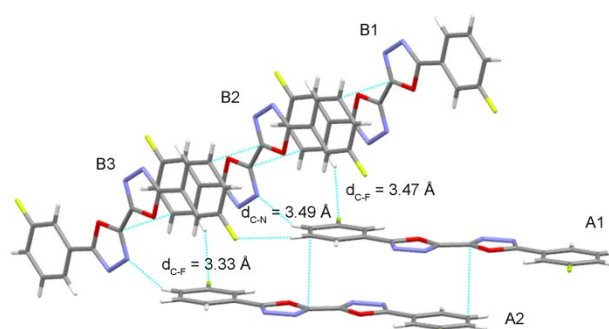

Figure S4 Other short contacts than  $\pi$ - $\pi$  stacking interactions found in BOXD-*m*-F crystals.

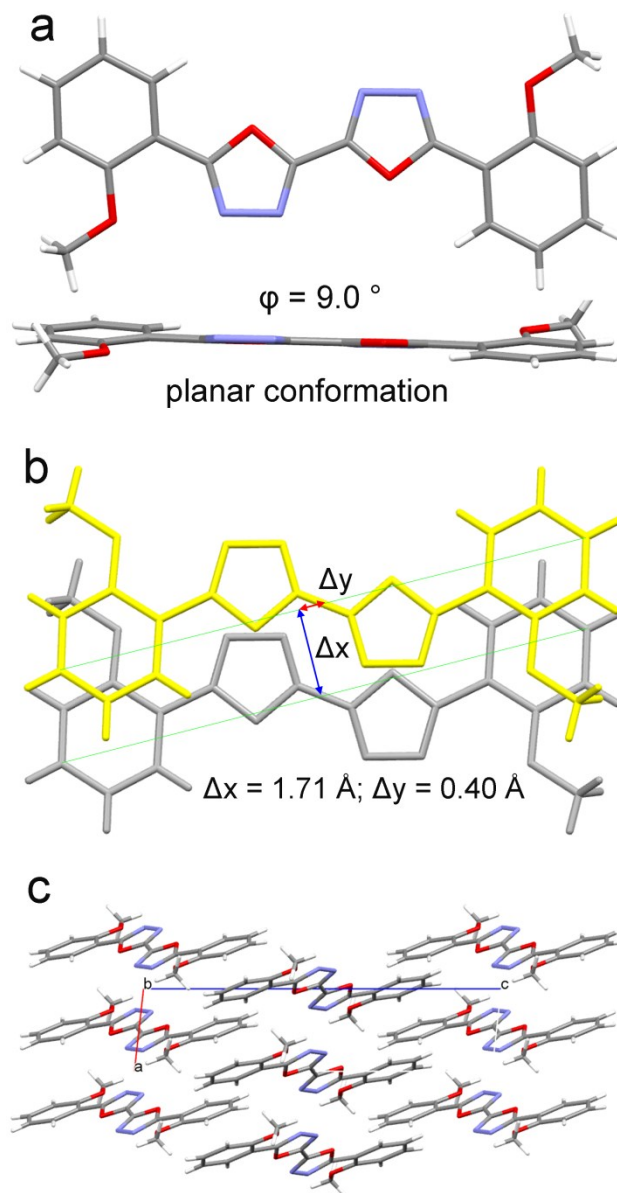

Figure S5 (a) Single crystal structure of BOXD-*o*-OCH<sub>3</sub>; (b) top view of the nearest dimer along the  $\pi$ -stacking direction of BOXD-*o*-OCH<sub>3</sub>; (c) the crystal packing of BOXD-*o*-OCH<sub>3</sub> viewed on the *b* axis.

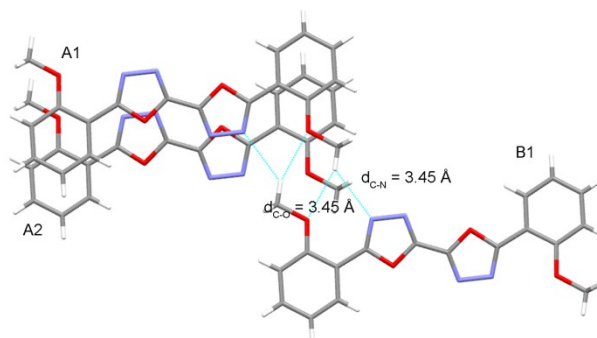

Figure S6 Other short contacts than  $\pi$ - $\pi$  stacking interactions found in BOXD-*o*-OCH<sub>3</sub> crystals.

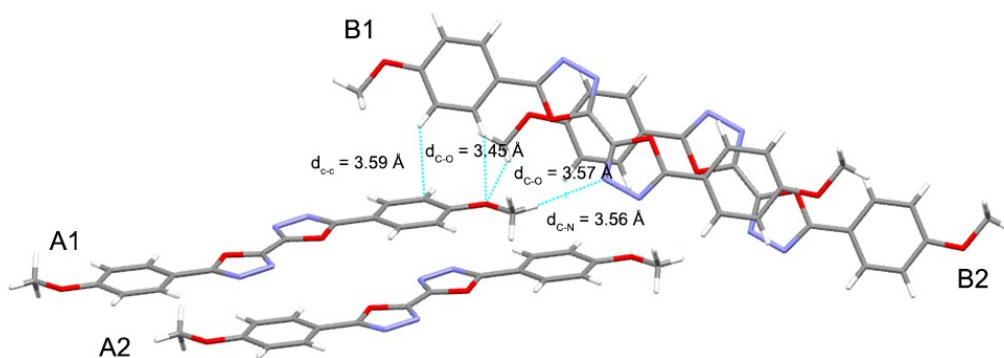

Figure S7 Other short contacts than  $\pi$ - $\pi$  stacking interactions found in BOXD-1 crystals.

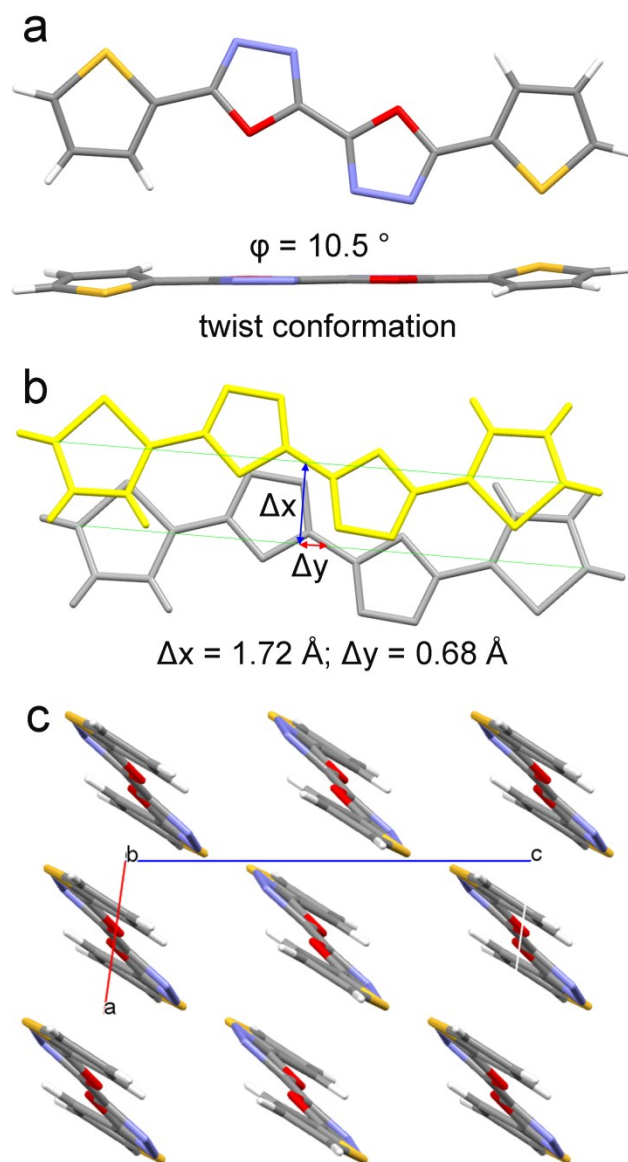

Figure S8 (a) Single crystal structure of TBOX; (b) top view of the nearest dimer along the  $\pi$ -stacking direction of TBOXD; (c) the crystal packing of TBOXD viewed on the b axis.

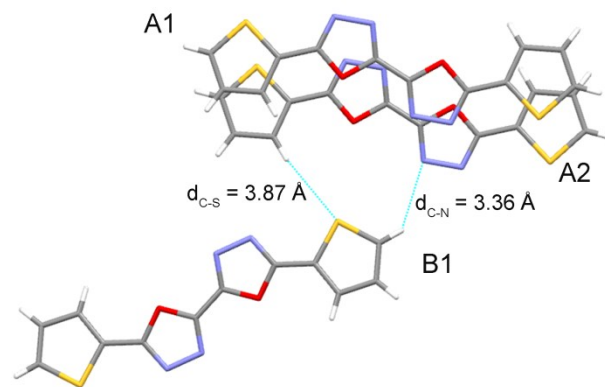

Figure S9 Other short contacts than  $\pi$ - $\pi$  interactions found in TBOXD crystals.

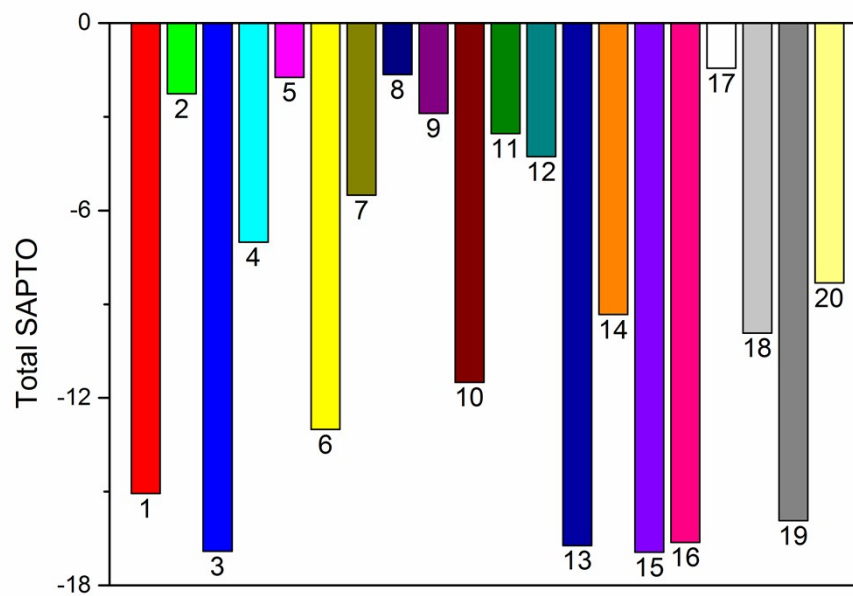

Figure S10 Calculated total SPATO energy of all the structures. The number stands for the structure corresponding with the number in table S3.

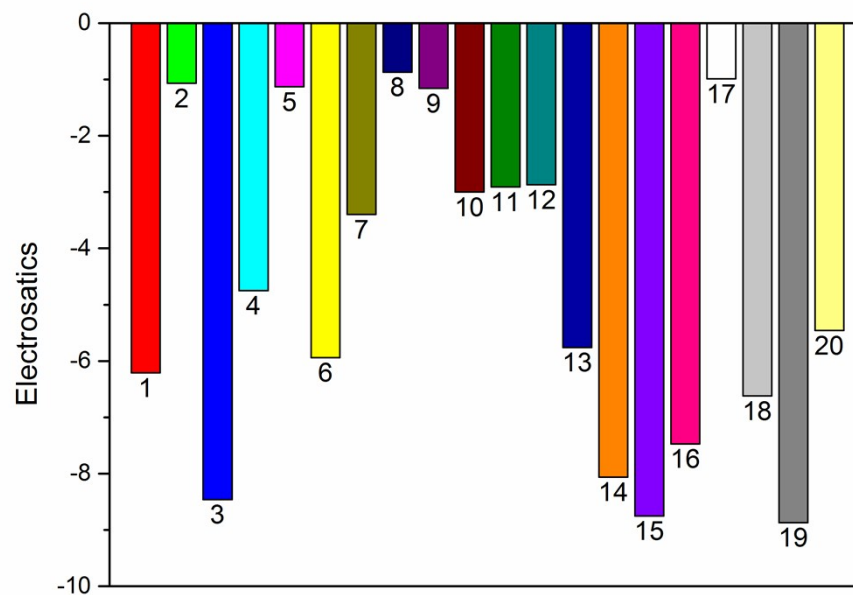

Figure S11 Calculated electrostatics of all the structures. The number stands for the structure corresponding with the number in table S3.

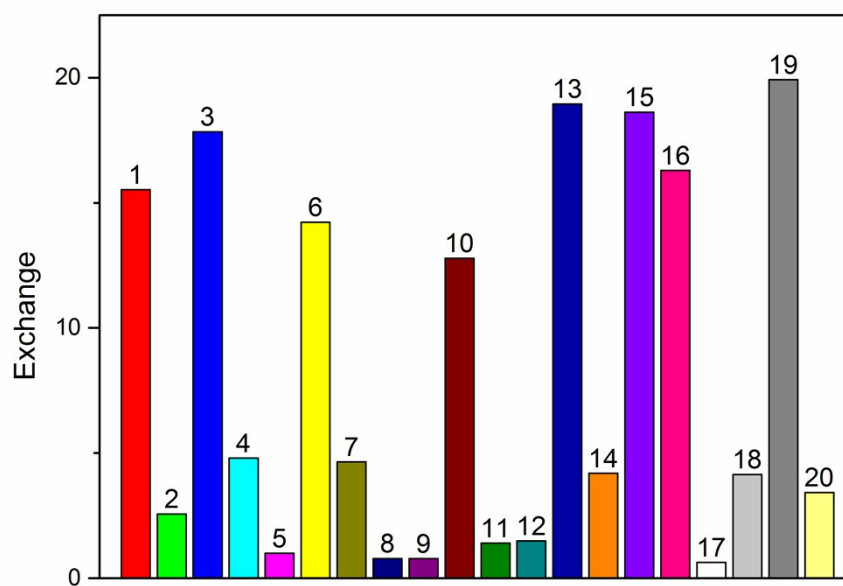

Figure S12 Calculated exchange of all the structures. The number stands for the structure corresponding with the number in table S3.



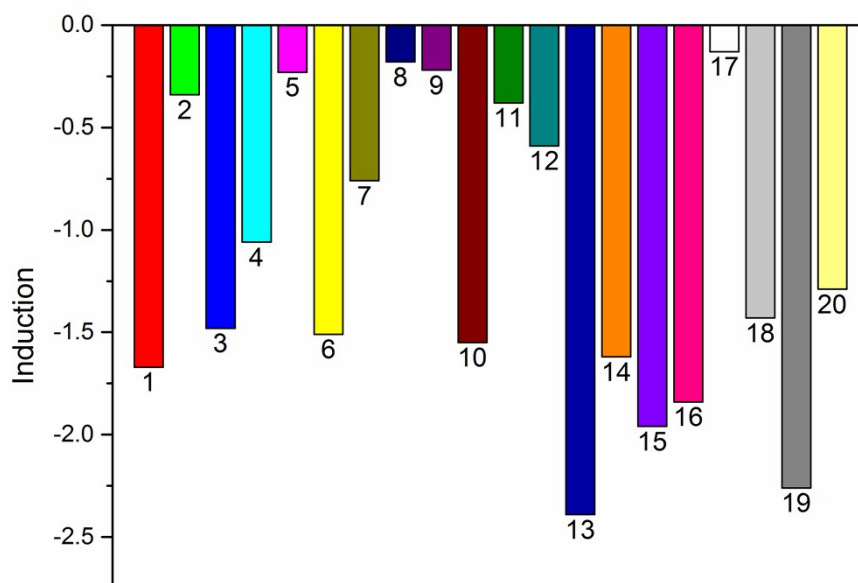

Figure S13 Calculated induction of all the structures. The number stands for the structure corresponding with the number in table S3.

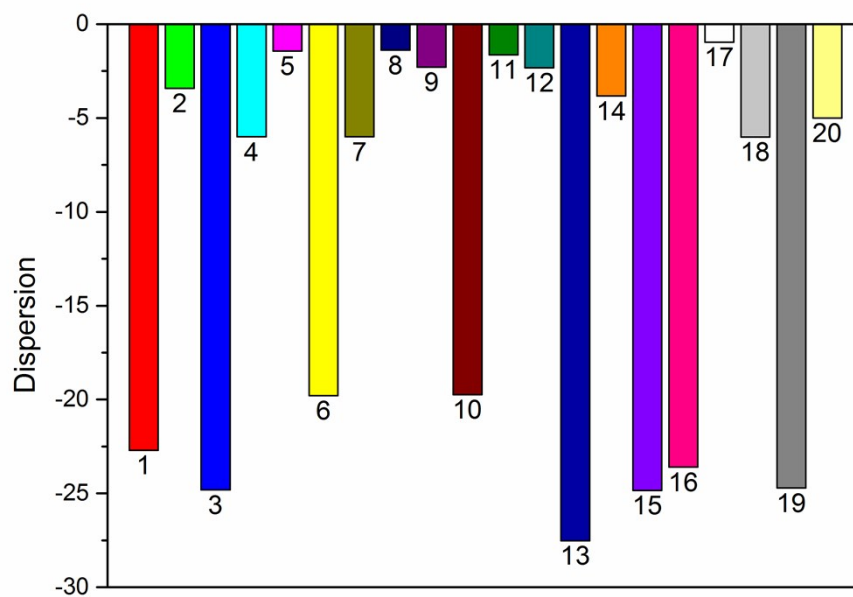

Figure S14 Calculated dispersion of all the structures. The number stands for the structure corresponding with the number in table S3.

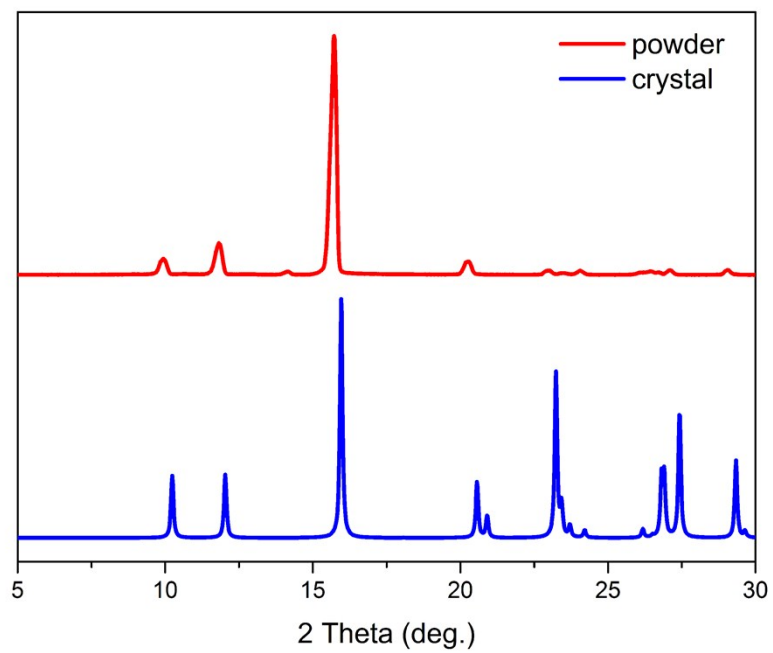

Figure S15 X-ray diffraction pattern of BOXD

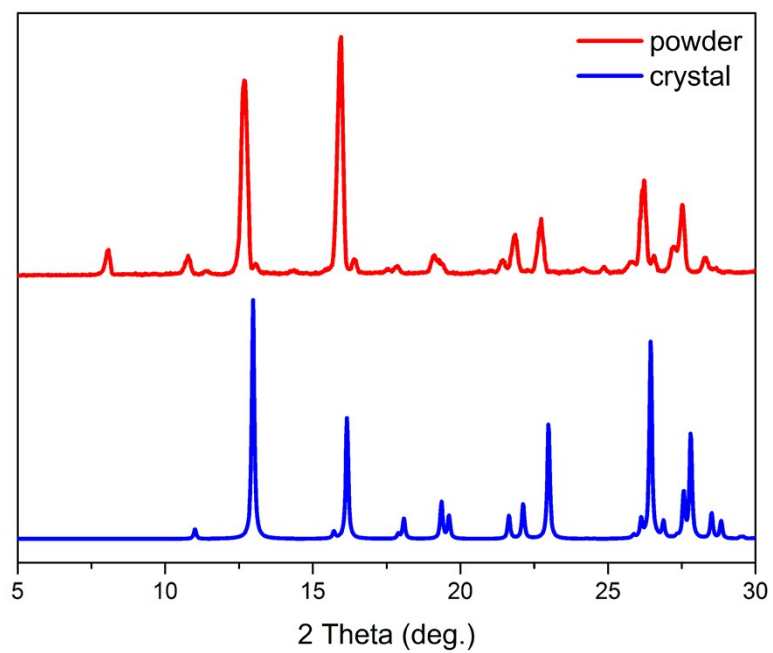

Figure S16 X-ray diffraction pattern of BOXD-*o*-F

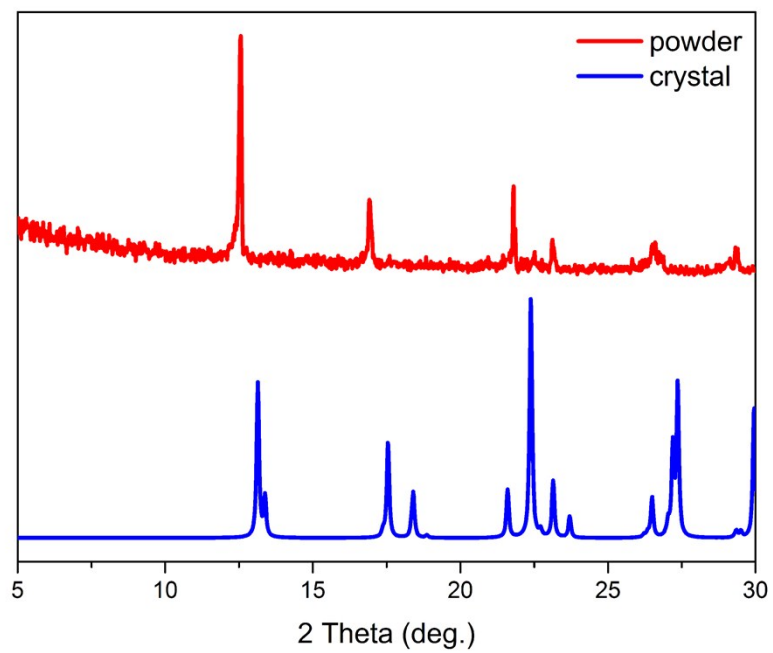

Figure S17 X-ray diffraction pattern of BOXD-*m*-F

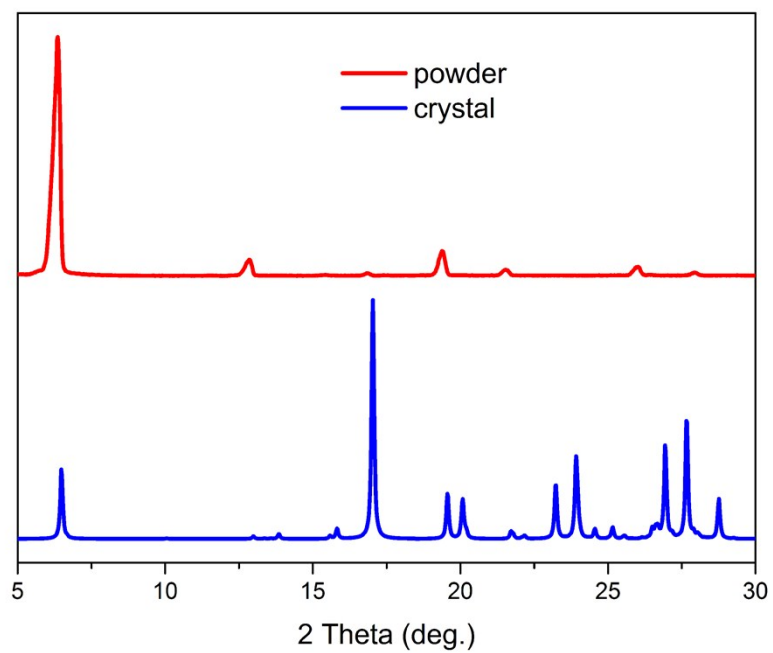

Figure S18 X-ray diffraction pattern of BOXD-*p*-F

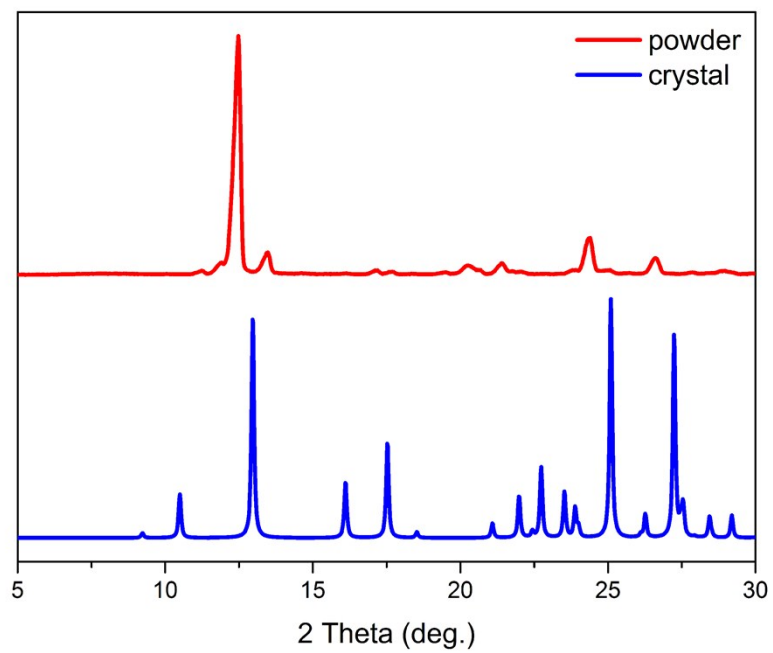

Figure S19 X-ray diffraction pattern of BOXD-*o*-OCH<sub>3</sub>

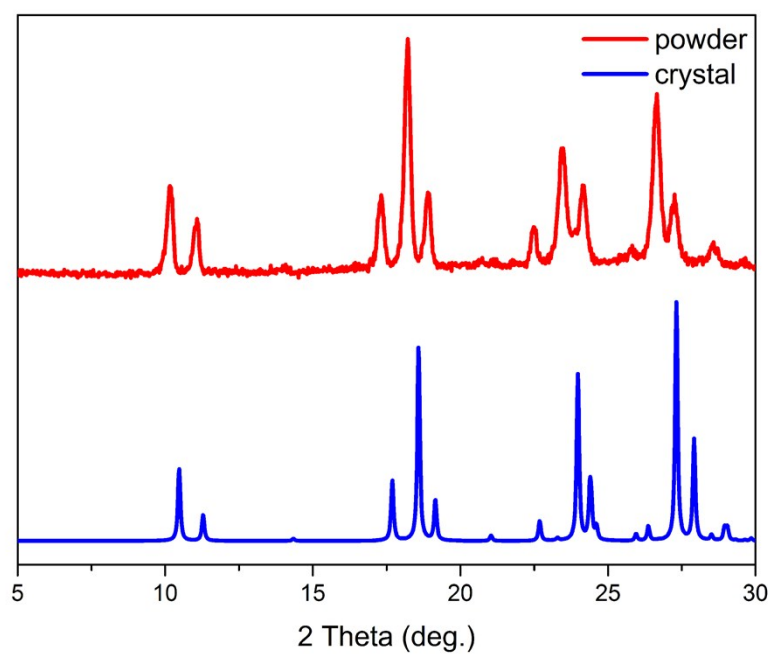

Figure S20 X-ray diffraction pattern of TBOXD

Table S1 Bond length of these bi-1,3,4-oxadiazole derivatives.

| Length (Å) | BOXD  | BOXD- <i>m</i> -F | BOXD- <i>o</i> -F | BOXD- <i>o</i> -OCH <sub>3</sub> | BOXD- <i>p</i> -F | TBOXD |
|------------|-------|-------------------|-------------------|----------------------------------|-------------------|-------|
| O1-C8      | 1.359 | 1.35              | 1.34              | 1.35                             | 1.35              | 1.36  |
| O1-C7      | 1.37  | 1.36              | 1.37              | 1.37                             | 1.36              | 1.37  |
| N1-C7      | 1.30  | 1.28              | 1.29              | 1.29                             | 1.29              | 1.29  |
| N1-N2      | 1.40  | 1.40              | 1.40              | 1.40                             | 1.41              | 1.40  |
| N2-C8      | 1.28  | 1.27              | 1.27              | 1.28                             | 1.28              | 1.29  |
| C1-C2      | 1.37  | 1.36              | 1.38              | 1.38                             | 1.36              | 1.36  |
| C2-C3      | 1.38  | 1.37              | 1.38              | 1.38                             | 1.38              | 1.42  |
| C1-C6      | 1.38  | 1.38              | 1.38              | 1.38                             | 1.36              | -     |
| C5-C6      | 1.38  | 1.38              | 1.37              | 1.39                             | 1.38              | -     |
| C4-C5      | 1.39  | 1.39              | 1.39              | 1.40                             | 1.39              | -     |
| C3-C4      | 1.39  | 1.38              | 1.39              | 1.40                             | 1.38              | 1.38  |
| C4-C7      | 1.45  | 1.46              | 1.46              | 1.45                             | 1.45              | 1.44  |
| C8-C8      | 1.44  | 1.45              | 1.46              | 1.45                             | 1.44              | 1.43  |

Table S2 Bond angle of these bi-1,3,4-oxadiazole derivatives.

| Angle (°)  | BOXD  | BOXD- <i>m</i> -F | BOXD- <i>o</i> -F | BOXD- <i>o</i> -OCH <sub>3</sub> | BOXD- <i>p</i> -F | TBOXD |
|------------|-------|-------------------|-------------------|----------------------------------|-------------------|-------|
| C8-O1-C7   | 102.0 | 101.6             | 101.6             | 102.0                            | 102.0             | 102.2 |
| C7-N1-N2   | 106.5 | 106.1             | 106.6             | 106.6                            | 106.3             | 106.6 |
| C8-N2-N1   | 105.4 | 105.6             | 105.2             | 105.5                            | 105.4             | 105.9 |
| N1-C7-O1   | 112.1 | 112.6             | 111.9             | 111.7                            | 112.3             | 111.7 |
| N1-C7-C4   | 128.5 | 127.8             | 130.8             | 131.7                            | 129.2             | 129.4 |
| O1-C7-C4   | 119.2 | 119.4             | 117.2             | 116.4                            | 118.3             | 118.8 |
| N2-C8-O1   | 113.8 | 113.8             | 114.4             | 114.0                            | 113.7             | 113.4 |
| C1-C2-C3   | 120.6 | 123.4             | 119.8             | 119.1                            | 118.2             | 118.6 |
| C2-C1-C6   | 119.9 | 118.1             | 120.3             | 120.8                            | 123.5             | 123.1 |
| C1-C6-C5   | 120.2 | 120.6             | 119.2             | 120.6                            | 118.1             | 118.2 |
| C4-C5-C6   | 119.8 | 119.5             | 122.0             | 119.0                            | 120.0             | 120.6 |
| C3-C4-C5   | 119.6 | 120.7             | 117.8             | 118.8                            | 119.7             | 119.3 |
| C3-C4-C7   | 121.3 | 120.7             | 120.9             | 119.1                            | 120.7             | 121.2 |
| C5-C4-C7   | 119.0 | 118.5             | 121.4             | 121.9                            | 119.4             | 119.4 |
| C2-C3-C4   | 119.6 | 117.5             | 120.9             | 121.4                            | 120.2             | 120.2 |
| N2-C8-C8#1 | 128.1 | 128.0             | 128.0             | 128.0                            | 128.2             | 128.5 |
| O1-C8-C8#1 | 117.9 | 118.1             | 117.5             | 117.9                            | 118.1             | 118.1 |

TableS3 The calculated result of these bi-1,3,4-oxadiazole derivatives. .

| Compound                         | No. | molecules | Total SAPT | Electrostatics | Exchange | Induction | Dispersion | Interaction            | Distance (Å)   |
|----------------------------------|-----|-----------|------------|----------------|----------|-----------|------------|------------------------|----------------|
| BOXD                             | 1   | A1A2      | -15.06     | -6.21          | 15.52    | -1.67     | -22.70     | $\pi$ - $\pi$          | 3.35           |
|                                  | 2   | A1B1      | -2.27      | -1.07          | 2.57     | -0.34     | -3.42      | C-H- $\pi$             | 3.72           |
|                                  | 3   | A1A2      | -16.91     | -8.46          | 17.84    | -1.48     | -24.81     | $\pi$ - $\pi$          | 3.33           |
| BOXD-1                           | 4   | A1B1      | -7.01      | -4.75          | 4.80     | -1.06     | -6.00      | C-H-N,C-H-O,C-H- $\pi$ | 3.56,3.45,3.59 |
|                                  | 5   | A1B2      | -1.74      | -1.13          | 1.0      | -0.23     | -1.43      | C-H-O                  | 3.57           |
|                                  | 6   | A1A2      | -13.01     | -5.94          | 14.23    | -1.51     | -19.79     | $\pi$ - $\pi$          | 3.36           |
| BOXD- <i>m</i> -F                | 7   | A1B2      | -5.51      | -3.40          | 4.65     | -0.76     | -6.00      | C-H-N                  | 3.49           |
|                                  | 8   | A1B3      | -1.65      | -0.87          | 0.79     | -0.18     | -1.39      | C-H-F                  | 3.33           |
|                                  | 9   | A1B1      | -2.89      | -1.16          | 0.78     | -0.22     | -2.29      | C-H-F                  | 3.47           |
| BOXD- <i>o</i> -F                | 10  | A1A2      | -11.50     | -3.00          | 12.79    | -1.55     | -19.74     | $\pi$ - $\pi$          | 3.36           |
|                                  | 11  | A1C1      | -3.54      | -2.91          | 1.40     | -0.38     | -1.63      | C-H-F                  | 3.44           |
|                                  | 12  | A1B1      | -4.28      | -2.87          | 1.49     | -0.59     | -2.32      | C-H-F                  | 3.23           |
| BOXD- <i>o</i> -OCH <sub>3</sub> | 13  | A1A2      | -16.72     | -5.76          | 18.95    | -2.39     | -27.52     | $\pi$ - $\pi$          | 3.52           |
|                                  | 14  | A1B1      | -9.33      | -8.06          | 4.19     | -1.62     | -3.83      | C-H-N, C-H-O           | 3.45, 3.45     |
|                                  | 15  | A1A2      | -16.94     | -8.75          | 18.62    | -1.96     | -24.84     | $\pi$ - $\pi$          | 3.36           |
| BOXD- <i>p</i> -F                | 16  | B1B2      | -16.62     | -7.47          | 16.29    | -1.84     | -23.60     | $\pi$ - $\pi$          | 3.44           |
|                                  | 17  | A1C1      | -1.45      | -0.99          | 0.63     | -0.13     | -0.96      | C-H-F                  | 3.38           |
|                                  | 18  | A2B1      | -9.92      | -6.62          | 4.15     | -1.43     | -6.01      | C-H-N                  | 3.32, 3.41     |
| TBOXD                            | 19  | A1A2      | -15.93     | -8.87          | 19.92    | -2.26     | -24.71     | $\pi$ - $\pi$          | 3.37           |
|                                  | 20  | A1B1      | -8.32      | -5.46          | 3.43     | -1.29     | -5.00      | C-H-S, C-H-N           | 3.87, 3.36     |
